# Supplementary material for: Shifts in Sources of Food but Stable Nutritional Outcomes among Children in the Early Months of the COVID-19 Pandemic
Source: MDPI journal article supplement (doi:10.3390/ijerph182312626), 2021-11-30
Supplement: s1 [file s1]

**Table S1.** Aggregated categories for sources of food.

| <b>Original category</b>                    | <b>Aggregated category</b> |
|---------------------------------------------|----------------------------|
| Store                                       | Store                      |
| Mail order purchase                         | Store                      |
| Grown or caught by you or someone you know  | Store                      |
| Fish from the ocean                         | Store                      |
| Restaurant with waiter/waitress             | Restaurant                 |
| Restaurant fast, food/pizza                 | Restaurant                 |
| Bar/tavern/lounge                           | Restaurant                 |
| Restaurant no additional info               | Restaurant                 |
| Cafeteria not at school                     | Restaurant                 |
| Residential dining facility                 | Restaurant                 |
| Sport recreation, or entertainment facility | Restaurant                 |
| Street vendor, vending truck                | Restaurant                 |
| Fundraiser sales                            | Restaurant                 |
| Vending machine                             | Restaurant                 |
| Cafeteria at school                         | School                     |
| Child care center                           | Childcare                  |
| Family/adult day care center                | Childcare                  |
| Soup kitchen/shelter/food pantry            | Food pantry                |
| Community food program, other               | Food pantry                |
| Common coffee pot or snack tray             | Food pantry                |
| From someone else/gift                      | Food pantry                |
| Other, Specify                              | Unknown                    |
